# Supplementary material
Source: PubMed Central journal article supplement (PMC3513740)
Supplement: CJN.02160212_CJN02160212SupplementaryData.pdf [file CJN.02160212_CJN02160212SupplementaryData.pdf]

**Supplementary Table 1.** Demographic and physiological characteristics in individuals with and without follow-up CAC assessment.

|                                          | <b>No follow-up CAC assessment</b> | <b>CAC assessment</b> | <b>P-value</b> |
|------------------------------------------|------------------------------------|-----------------------|----------------|
| <b>Demographics</b>                      |                                    |                       |                |
| <b>Age, years</b>                        | 50.7±14.7                          | 50.7±11.9             | 0.99           |
| <b>Women, %</b>                          | 26                                 | 35                    | 0.37           |
| <b>Black, %</b>                          | 65                                 | 63                    | 0.87           |
| <b>Baseline characteristics</b>          |                                    |                       |                |
| <b>Diabetes, %</b>                       | 55                                 | 51                    | 0.71           |
| <b>Cardiovascular disease, %</b>         | 26                                 | 26                    | 0.97           |
| <b>Ever smoker, %</b>                    | 55                                 | 51                    | 0.71           |
| <b>Body mass index, kg/m<sup>2</sup></b> | 28.8±6.0                           | 29.6±5.7              | 0.55           |
| <b>Systolic blood pressure, mmHg</b>     | 134±18                             | 137±22                | 0.49           |
| <b>Diastolic blood pressure, mmHg</b>    | 79±11                              | 77±12                 | 0.55           |
| <b>Medication use</b>                    |                                    |                       |                |
| <b>Statins, %</b>                        | 35                                 | 43                    | 0.45           |
| <b>Antihypertensive medications, %</b>   |                                    |                       |                |
| • <b>Beta-blockers</b>                   | 58                                 | 64                    | 0.57           |
| • <b>Diuretics</b>                       | 38                                 | 38                    | 0.98           |
| • <b>ACE-inhibitors or ARBs</b>          | 38                                 | 49                    | 0.30           |
| <b>Phosphate binders, %</b>              | 35                                 | 65                    | 0.87           |

| <b>Laboratory assessment</b>                 |           |           |      |
|----------------------------------------------|-----------|-----------|------|
| <b>Total cholesterol, mg/dL</b>              | 168±43    | 169±35    | 0.99 |
| <b>Creatinine, mg/dL</b>                     | 6.6±2.5   | 6.0±2.3   | 0.17 |
| <b>Parathyroid hormone (PTH),<br/>pgm/mL</b> | 243±172   | 259±226   | 0.73 |
| <b>Phosphate, mg/dL</b>                      | 4.8±1.3   | 4.4±1.3   | 0.17 |
| <b>Calcium, mg/dL</b>                        | 8.6±1.1   | 8.9±1.1   | 0.23 |
| <b>25-OH vitamin D, ng/mL</b>                | 26.2±14.5 | 26.0±15.6 | 0.93 |
| <b>Albumin, g/dL</b>                         | 3.4±0.6   | 3.5±0.6   | 0.28 |
| <b>hsCRP, mg/L</b>                           | 14.9±28.7 | 14.9±37.5 | 0.99 |
| <b>FGF-23, RU/mL median</b>                  | 2562±3080 | 1973±2796 | 0.34 |
| <b>Baseline coronary calcium assessment</b>  |           |           |      |
| <b>Baseline Agatston score</b>               | 438±793   | 164±292   | 0.01 |
| <b>Baseline calcium volume<br/>score</b>     | 348±625   | 132±237   | 0.02 |

Clinical characteristics are expressed as mean±SD, or %
